# Supplementary material
Source: HighWire-hosted journal article supplement (https://rmdopen.bmj.com/content/6/1/e000989)
Supplement: inline-supplementary-material-1 [file inline-supplementary-material-1.pdf]

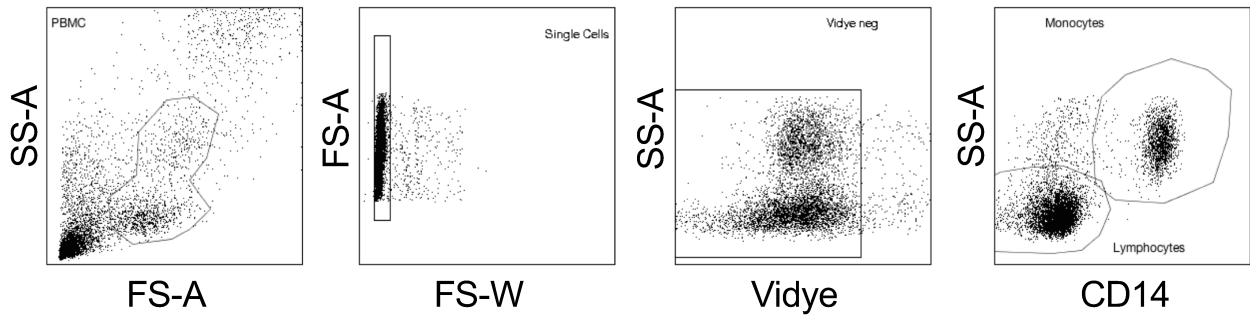

**Supplementary figure 1. Gating strategy for SIGLEC-1 expression on monocytes.**

Gates created and applied from left to right: PBMC among all events, single cells among PBMC, live cells (vidye negative) among singlets, monocytes (CD14<sup>+</sup>) among live cells. SIGLEC-1 median fluorescence intensity was derived from the monocyte population. Data from one control neonate are depicted.
